# Supplementary material
Source: ML conference proceedings conference paper supplement (https://openreview.net/forum?id=D04TGKz5rfF)
Supplement: supplementary_material [file attachment]

## A PROOFS

### A.1 PROOF OF THEOREM 1

According to [8], the update of  $\tau(\tilde{\delta}[k])$  for  $k$ -th frequency component of  $l_2$  norm FGM adversarial perturbation at the  $(t+1)$ -th step is proportional to

$$(1 - 2\tilde{\eta}_2^{(t)})|\tilde{\nabla}f^{(t)}[k]|^2 - 2\tilde{\eta}^{(t)}|\tilde{\nabla}f^{(t)}[k]||\tilde{\mathbf{x}}[k]| \cos(\Delta\varphi_k^{(t)}). \quad (13)$$

We adopt the following representations to see trends of  $\cos(\Delta\varphi_k^{(t)})$  through the training process:

$$\begin{aligned} \tilde{\nabla}f^{(t)}[k] &:= \overrightarrow{c_{(t)}} = (|c_{(t)}| \cos \theta, |c_{(t)}| \sin \theta) \\ \tilde{\mathbf{x}}[k] &:= \overrightarrow{x_{(k)}} = (|x_{(k)}| \cos \zeta, |x_{(k)}| \sin \zeta), \end{aligned}$$

then  $|\tilde{\nabla}f^{(t+1)}[k]||\tilde{\mathbf{x}}[k]| \cos(\Delta\varphi_k^{(t)})$  will have the form of

$$\langle \overrightarrow{c_{(t+1)}}, \overrightarrow{x_{(k)}} \rangle = (1 - \tilde{\eta}^{(t)}) \langle \overrightarrow{c_{(t)}}, \overrightarrow{x_{(k)}} \rangle - \tilde{\eta}^{(t)} |x_{(k)}|^2 + \mathcal{O}(\eta^2)$$

at the  $(t+1)$ -th step. At the  $(t+1)$ -th step, we have

$$\Delta\tau_l^{(t+1)} - \Delta\tau_h^{(t+1)} = (1 - \tilde{\eta}^{(t)})(\Delta\tau_l^{(t)} - \Delta\tau_h^{(t)}) + \tilde{\eta}^{(t)}(L_x - H_x), \quad (14)$$

which means that if  $\Delta\tau_l^{(t)} > \Delta\tau_h^{(t)}$  then we must have  $\Delta\tau_l^{(t')} > \Delta\tau_h^{(t')}$  for all  $t' \geq t$ . Besides, there must be a step which leads to this condition since  $L_x > H_x$ . Let  $L^{(t)} = \sum_{k=0}^{k_c} |\tilde{\nabla}f[k]|^2$  and  $H^{(t)} = \sum_{k=k_c+1}^{(d-1)/2} |\tilde{\nabla}f[k]|^2$ . At the  $(t+1)$ -th step, the changed amount of  $\tau(\tilde{\delta} \in S_l)$  is

$$\begin{aligned} & \frac{(1 - 2\tilde{\eta}^{(t)})L^{(t)} + \tilde{\eta}^{(t)}\Delta\tau_l^{(t)}}{(1 - 2\tilde{\eta}^{(t)})(L^{(t)} + H^{(t)}) + \tilde{\eta}^{(t)}(\Delta\tau_l^{(t)} + \Delta\tau_h^{(t)})} - \frac{L^{(t)}}{L^{(t)} + H^{(t)}} \\ &= \tilde{\eta}^{(t)} \frac{\Delta\tau_l^{(t)}\tau(\tilde{\delta}^{(t)} \in S_h) - \Delta\tau_h^{(t)}\tau(\tilde{\delta}^{(t)} \in S_l)}{\sum_{k=0}^{(d-1)/2} |\tilde{\nabla}f^{(t+1)}[k]|^2}. \end{aligned} \quad (15)$$

If  $\Delta\tau_l^{(t)} > \Delta\tau_h^{(t)}$  and  $\tau(\tilde{\delta}^{(t)} \in S_h) > \tau(\tilde{\delta}^{(t)} \in S_l)$  then the above changed amount will be positive and gradient descent will increase  $\tau(\tilde{\delta} \in S_l)$  at this step.

### A.2 PROOF OF THEOREM 2

We provide the proof for ReLU activation function. The update rules of  $R_k$  at the  $(t+1)$ -th step are

$$\begin{aligned} R_k^{(t+1)2} &= R_k^{(t)2} - 2\tilde{\eta}^{(t)}R_k^{(t)} \cos(\Delta\varphi_k^{(t)}) \\ R_k^{(t)} \cos(\Delta\varphi_k^{(t)}) &= R_k^{(t-1)} \cos(\Delta\varphi_k^{(t-1)}) - \tilde{\eta}^{(t-1)}. \end{aligned}$$

For any  $k > k' > 0$  with  $R_k^{(0)} > R_{k'}^{(0)}$ , we have

$$\begin{aligned} R_k^{(t+1)2} - R_{k'}^{(t+1)2} &= R_k^{(t)2} - R_{k'}^{(t)2} - 2\tilde{\eta}^{(t)} [R_k^{(t)} \cos(\Delta\varphi_k^{(t)}) - R_{k'}^{(t)} \cos(\Delta\varphi_{k'}^{(t)})] \\ &= R_k^{(0)2} - R_{k'}^{(0)2} - 2 \sum_{t'=0}^t \tilde{\eta}^{(t')} [R_k^{(0)} \cos(\Delta\varphi_k^{(0)}) - R_{k'}^{(0)} \cos(\Delta\varphi_{k'}^{(0)})] \end{aligned}$$

at the  $(t+1)$ -th step. Considering the case when  $\cos(\Delta\varphi_k^{(0)}) = -\cos(\Delta\varphi_{k'}^{(0)}) = 1$  and  $\tilde{\eta}^{(t')} = \tilde{\eta}_{\max}$  and the condition that the left L.H.S of the above equation is larger than 0 gives us Eq. (10). On the other hand, if  $R_k^{(0)} \cos(\Delta\varphi_k^{(0)}) - R_{k'}^{(0)} \cos(\Delta\varphi_{k'}^{(0)}) < 0$ , then  $R_k^{(t)} > R_{k'}^{(t)2}$  for all  $t \geq 0$ .

### A.3 PROOF OF THEOREM 3

We consider the case for  $l_2$  FGM perturbations, the case for PGD perturbations is similar. If the condition in Eq. (11) is satisfied, then at the  $(t+1)$ -th step,

$$\tau(\tilde{\delta}^{(t+1)}) = \tau(\tilde{x} \in S_l) - \zeta + \tilde{\eta}^{(t)} \frac{\Delta \tau_l^{(t)} \tau(\tilde{\delta}^{(t)} \in S_h) - \Delta \tau_h^{(t)} \tau(\tilde{\delta}^{(t)} \in S_l)}{\sum_{k=0}^{(d-1)/2} |\widetilde{\nabla f}^{(t+1)}[k]|^2} < \tau(\tilde{x} \in S_l). \quad (16)$$

## B PGD PERTURBATIONS

### B.1 $l_2$ -PGD PERTURBATIONS

The PGD update rule for finding perturbations of  $x$  with learning rate  $\xi$  at step  $j+1$  is:

$$\delta^{(j+1)} = \mathcal{P}_{\mathcal{B}(0, \epsilon)} \left[ \delta^{(j)} + \xi \frac{\partial \ell}{\partial f}^{(j)} \nabla_x f^{(j)} \right], \quad (17)$$

where  $\mathcal{B}(0, \epsilon)$  is a ball centered at 0 with radius  $\epsilon$  in Euclidean space and  $\mathcal{P}$  is the projection operator defined as

$$\mathcal{P}_{\mathcal{B}(0, \epsilon)}[\delta] = \underset{\delta' \in \mathcal{B}(0, \epsilon)}{\operatorname{argmin}} \|\delta' - \delta\|^2.$$

Note that in this part quantities removing the step script  $j$  (e.g.  $\frac{\partial \ell}{\partial f}$  and  $\nabla_x f$ ) refers to not involving perturbations. For convenience, we use the same learning rate  $\xi$  for all steps  $j$  and instead explore the update of

$$\kappa^{(j)} = \frac{\delta^{(j)}}{\xi} \quad (18)$$

to the order of  $\delta$  to see trends of PGD perturbations in frequency domain alongside PGD iterations since  $\tau(\tilde{\delta}[k]) = \tau(\tilde{\kappa}[k])$ . For ease of notation, we adopt the following representations: Let  $\Delta \phi_k^{(j)}$  denote the difference of phases between  $\widetilde{\nabla f}[k]$  and  $\tilde{\kappa}^{(j)}[k]$ ; let  $\bar{\beta}^{(j)} = \partial \ell / \partial f + \delta^{(j)} \cdot \nabla_x f$  where  $\bar{\beta}^{(0)} > 0$  and one can drive similar result for  $\bar{\beta}^{(0)} < 0$ ; we denote

$$\Delta \bar{\tau}_l^{(j)} \triangleq 2 \sum_{k=0}^{k_c} |\tilde{\kappa}^{(j)}[k]| |\widetilde{\nabla f}[k]| \cos(\Delta \phi_k^{(j)}) \quad \text{and} \quad \Delta \bar{\tau}_h^{(j)} \triangleq 2 \sum_{k=k_c+1}^{(d-1)/2} |\tilde{\kappa}^{(j)}[k]| |\widetilde{\nabla f}[k]| \cos(\Delta \phi_k^{(j)}),$$

where  $\bar{\beta}^{(j)} \Delta \bar{\tau}_l^{(j)}$  and  $\bar{\beta}^{(j)} \Delta \bar{\tau}_h^{(j)}$  are changed amounts of LFC and HFC of  $|\kappa|^2$  at the  $(j+1)$ -th step of PGD iteration. We provide below our result on frequency spectrum of  $l_2$ -norm PGD perturbations.

**Theorem 4 (The spectral trajectory of  $l_2$  PGD perturbation)** *Iteration of the  $(j+1)$ -th step of PGD will change the ratio of LFC of  $l_2$  norm PGD adversarial perturbation for a neural network (1) which satisfies  $|\partial \ell / \partial f| = \epsilon^{1+\nu}$  with  $0 < \nu < 1$  as follows,*

$$\tau(\tilde{\delta} \in S_l) \leftarrow \tau(\tilde{\delta} \in S_l) + \bar{\beta}^{(j)} \frac{\Delta \bar{\tau}_l^{(j)} \tau(\tilde{\delta}^{(j)} \in S_h) - \Delta \bar{\tau}_h^{(j)} \tau(\tilde{\delta}^{(j)} \in S_l)}{\sum_{k=0}^{(d-1)/2} |\tilde{\kappa}^{(j+1)}[k]|^2}. \quad (19)$$

**Remark** If the two-layer neural network in (1) is trained with at least  $t \geq t_0$  steps ( $t_0$  determined by theorem 1) such that  $\tau(\widetilde{\nabla f} \in S_l) > \tau(\widetilde{\nabla f} \in S_h)$ , then, according to theorem 4, there exists

$$j_0 = \max \left\{ 0, \frac{\Delta \bar{\tau}_h^{(0)} - \Delta \bar{\tau}_l^{(0)}}{\bar{\beta} \left( \sum_{k=0}^{k_c} |\widetilde{\nabla f}[k]|^2 - \sum_{k=k_c}^{(d-1)/2} |\widetilde{\nabla f}[k]|^2 \right)} \right\}, \quad (20)$$

where  $\bar{\beta} = \max_{i \in [0, j_0]} \bar{\beta}^{(i)}$ , such that  $\tau(\tilde{\delta}^{(j+1)} \in S_l) > \tau(\tilde{\delta}^{(j)} \in S_l)$  for all  $j > j_0$  if  $\tau(\tilde{\delta}^{(j)} \in S_l) < \tau(\tilde{\delta}^{(j)} \in S_h)$ .

### B.1.1 PROOF OF THEOREM 4

At the  $(j+1)$ -th step of PGD update for  $\kappa^{(j+1)}$ , if

1.  $\mathcal{P}_{\mathcal{B}(0,\epsilon)}^{(j)} = I$ :

$$\kappa^{(j+1)} = \kappa^{(j)} + \frac{\partial \ell}{\partial f} \nabla_{\mathbf{x}} f + \frac{\partial \ell}{\partial f} \sum_r a_r \sigma'' \delta^{(j)} \cdot \mathbf{W}_{:,r} \mathbf{W}_{:,r} + \delta^{(j)} \cdot \nabla_{\mathbf{x}} f \nabla_{\mathbf{x}} f + \mathcal{O}(\delta^2);$$

2.  $\mathcal{P}_{\mathcal{B}(0,\epsilon)}^{(j)} \neq I$ :

$$\kappa^{(j+1)} = \frac{\epsilon}{\|\kappa^{(j)} + \nabla_{\mathbf{x}} \ell^{(j)}\|} \left( \kappa^{(j)} + \frac{\partial \ell}{\partial f} \nabla_{\mathbf{x}} f^{(j)} \right).$$

In either case, the quantity  $\tau(\tilde{\kappa}[k])$  is proportional to

$$\left| \mathcal{F} \left( \kappa^{(j)} + \frac{\partial \ell}{\partial f} \nabla_{\mathbf{x}} f^{(j)} \right) \right|^2 = \left| \mathcal{F} \left( \kappa^{(j)} + \frac{\partial \ell}{\partial f} \nabla_{\mathbf{x}} f + \delta^{(j)} \cdot \nabla_{\mathbf{x}} f \nabla_{\mathbf{x}} f \right) \right|^2$$

since the term  $\delta \partial \ell / \partial f < \delta^2$  and can be dropped. Therefore, we now consider

$$\tilde{\kappa}^{(j+1)}[k] = \tilde{\kappa}^{(j)}[k] + \left( \frac{\partial \ell}{\partial f} + \delta^{(j)} \cdot \nabla_{\mathbf{x}} f \right) \widetilde{\nabla f}[k] \quad (21)$$

at the  $(j+1)$ -th step of PGD in the frequency domain to explore ratio of frequency  $k$  to the whole frequency spectrum of perturbations

$$\tau(\tilde{\delta}^{(j+1)}[k]) \propto |\tilde{\kappa}^{(j)}[k]|^2 + 2 \left( \beta' + \delta^{(j)} \cdot \nabla_{\mathbf{x}} f \right) |\tilde{\kappa}^{(j)}[k]| |\widetilde{\nabla f}[k]| \cos(\Delta \phi_k^{(j)}). \quad (22)$$

**Lemma 1 (Dynamics of  $l_2$  Norm PGD in the Frequency Domain)** *If the initialization of  $l_2$  norm PGD adversarial perturbation satisfies  $\frac{\partial \ell}{\partial f} + \delta^{(0)} \cdot \nabla_{\mathbf{x}} f > 0$ , then it will be positive at every iteration of PGD. In this case,  $\widetilde{\nabla f}$  will increase its  $k$ -th amplitude after*

$$j = \begin{cases} 0 & \text{if } \cos(\Delta \phi_k^{(0)}) \geq 0, \\ -\frac{|\tilde{\kappa}^{(0)}[k]| \cos(\Delta \phi_k^{(0)})}{(\beta' + \delta^{(0)} \cdot \nabla_{\mathbf{x}} f) |\widetilde{\nabla f}[k]|} & \text{if } \cos(\Delta \phi_k^{(0)}) < 0 \end{cases} \quad (23)$$

iterations of PGD<sup>3</sup>

Similar to Eq. (15), one can derive the changed amount of  $\tau(\tilde{\delta} \in S_l)$  in theorem 4 at the  $(j+1)$ -th step and find the condition of increasing.

### B.2 $l_\infty$ -PERTURBATIONS

We now dive into the case for  $l_\infty$  PGD perturbations. The PGD update rule at step  $j$  now becomes

$$\delta^{(j+1)} = \text{Clip}_{[-\epsilon, \epsilon]} \left[ \delta^{(j)} + \xi \cdot \text{sgn} \left( \frac{\partial \ell}{\partial f} \nabla_{\mathbf{x}} f^{(j)} \right) \right].$$

Let  $\mu \in \{0, 1, \dots, d\}$  and recall our definition that  $\partial_\mu f$  refers to the  $\mu$ -th component of  $\nabla_{\mathbf{x}} f$ , we have for the  $\mu$ -th component of  $\delta$  that

$$\delta_\mu^{(j+1)} = \text{Clip}_{[-\epsilon, \epsilon]} \left[ \delta_\mu^{(j)} + \xi \text{sgn} \left( \frac{\partial \ell}{\partial f} \partial_\mu f^{(j)} \right) \right]. \quad (24)$$

$l_\infty$  norm PGD adversarial perturbations for the two-layer neural network will have similar frequency spectrum to FGSM adversarial perturbations as stated below by theorem 5

<sup>3</sup> A similar conclusion exists when  $\frac{\partial \ell}{\partial f} + \delta^{(0)} \cdot \nabla_{\mathbf{x}} f < 0$ .

**Theorem 5**  $l_\infty$  norm adversarial perturbations generated by PGD for a well normally trained neural network (7) will end up with forms of  $l_\infty$  FGSM perturbations after at most  $2\epsilon/\xi$  steps.

For a simple neural network (e.g. our model), the above theorem claims that FGSM and PGD with enough iterations are in fact equivalent to generate a  $l_\infty$ -norm adversarial perturbation. Therefore it is possible to explore frequency spectrum of FGSM adversarial perturbations to provide insights on  $l_\infty$  PGD perturbations.

### B.2.1 PROOF OF THEOREM 5

For convenience, we explore the case when  $\partial\ell/\partial f + \delta^{(0)} \cdot \nabla_{\mathbf{x}} f > 0$ . In the PGD process, we first randomly find a  $\delta^{(0)}$ . The probability that its components satisfy the condition  $\delta_\mu \in [x_\mu - (\epsilon - \xi), x_\mu + (\epsilon - \xi)]$  for all  $\mu \in \{0, 1, \dots, d\}$

$$\left(\frac{\epsilon - \xi}{\epsilon}\right)^d$$

will be little when  $d$  is large, thus we expect that there will be at least some components  $\mu \in C_1^{(0)}$  such that

$$\epsilon - \xi \leq \delta_\mu^{(0)} \leq \epsilon$$

and at least some other  $\mu \in C_2^{(0)}$  such that

$$-\epsilon \leq \delta_\mu^{(0)} \leq -\epsilon + \xi.$$

Moreover, we let  $C_1^{\pm(0)}$  denote

$$C_1^{(0)} \cap \{\mu : \text{sgn}(\partial_\mu f) = \pm 1\}$$

and let  $C_2^{\pm(0)}$  denote

$$C_2^{(0)} \cap \{\mu : \text{sgn}(\partial_\mu f) = \pm 1\}.$$

If  $\partial\ell/\partial f + \delta^{(0)} \cdot \nabla_{\mathbf{x}} f > 0$ , the update rule of PGD at the first step will be

$$\begin{aligned} \delta_\mu^{(1)} &= \text{Clip}_{[-\epsilon, \epsilon]} \left[ \delta_\mu^{(0)} + \xi \text{sgn}(\partial_\mu f) \right] \\ &= \begin{cases} \epsilon & \mu \in C_1^{+(0)}, \\ -\epsilon & \mu \in C_2^{-(0)}, \\ \delta_\mu^{(0)} + \xi & \mu \in C_3^{(0)} \cup C_2^{+(0)}, \\ \delta_\mu^{(0)} - \xi & \mu \in C_4^{(0)} \cup C_1^{-(0)}, \end{cases} \end{aligned}$$

where  $d = |C_1^{(j)}| + |C_2^{(j)}| + |C_3^{(j)}| + |C_4^{(j)}|$  and  $\mu \in C_3^{(j)} \cup C_4^{(j)}$  denotes  $\delta_\mu^{(j)} \in [-\epsilon + \xi, \epsilon - \xi]$  with  $\partial_\mu f > 0 (< 0)$ . Specifically,  $\delta^{(1)} \cdot \nabla_{\mathbf{x}} f$  can be bounded by  $\delta^{(0)} \cdot \nabla_{\mathbf{x}} f$  as the following way:

$$\begin{aligned} \delta^{(1)} \cdot \nabla_{\mathbf{x}} f &= \epsilon \left( \sum_{\rho \in C_1^{+(0)}} \partial_\rho f - \sum_{\rho \in C_2^{-(0)}} \partial_\rho f \right) + \xi \left( \sum_{\rho \in C_3^{(0)} \cup C_2^{+(0)}} \partial_\rho f - \sum_{\rho \in C_4^{(0)} \cup C_1^{-(0)}} \partial_\rho f \right) \\ &\quad + \sum_{\rho \notin (C_1^{+(0)} \cup C_2^{-(0)})} \delta_\rho^{(0)} \partial_\rho f \\ &= \delta^{(0)} \cdot \nabla_{\mathbf{x}} f + \sum_{\rho \in C_1^{+(0)}} (\epsilon - \delta_\rho^{(0)}) \partial_\rho f - \sum_{\rho \in C_2^{-(0)}} (\epsilon + \delta_\rho^{(0)}) \partial_\rho f \\ &\quad + \xi \left( \sum_{\rho \in C_3^{(0)} \cup C_2^{+(0)}} \partial_\rho f - \sum_{\rho \in C_4^{(0)} \cup C_1^{-(0)}} \partial_\rho f \right) \end{aligned}$$

$$\begin{aligned} \rightarrow \delta^{(1)} \cdot \nabla_x f &\leq \left( \delta^{(0)} + \xi \cdot \text{sgn}(\nabla_x f) \right) \cdot \nabla_x f \\ \delta^{(1)} \cdot \nabla_x f &\geq \delta^{(0)} \cdot \nabla_x f. \end{aligned}$$

Following the iteration at step 2,

$$\begin{aligned} \delta_\mu^{(2)} &= \text{Clip}_{[-\epsilon, \epsilon]} \left[ \delta_\mu^{(1)} + \xi \text{sgn}(\partial_\mu f) \right] \\ &= \begin{cases} \epsilon & \mu \in C_1^{+(1)}, \\ -\epsilon & \mu \in C_2^{-(1)}, \\ \delta_\mu^{(1)} + \xi & \mu \in C_3^{(1)} \cup C_2^{+(1)} \\ \delta_\mu^{(1)} - \xi & \mu \in C_4^{(1)} \cup C_1^{-(1)}, \end{cases} \end{aligned}$$

where

$$\begin{aligned} C_1^{+(0)} &\subset C_1^{+(1)}, C_2^{-(0)} \subset C_2^{-(1)} \\ C_1^{-(1)} &= \emptyset, C_2^{+(1)} = \emptyset \\ C_3^{(1)} &\subset (C_3^{(0)} \cup C_2^{+(0)}), C_4^{(1)} \subset (C_4^{(0)} \cup C_1^{-(0)}). \end{aligned}$$

The above three sets of relations will be true for any other  $j$ —PGD does not reduce the number of components which are  $\text{sgn}(\partial_\mu f)\epsilon$  at every iteration. For any randomly chosen  $\delta^{(0)}$ , based on the above lemma, if there exists at least one component  $\delta_\mu^{(0)}$  such that

$$\delta_\mu^{(0)} = -\text{sgn}(\partial_\mu f)\epsilon,$$

it will then move towards the direction of  $+\text{sgn}(\partial_\mu f)\xi$  at every iteration  $j$  and finally become  $\text{sgn}(\partial_\mu f)\epsilon$  after  $2\epsilon/\xi$  steps. This is the longest step for any component to move to  $\text{sgn}(\partial_\mu f)\epsilon$  after which will it remain unchanged. Therefore, a PGD perturbation now has the form

$$\delta = \epsilon \cdot \text{sgn}(\nabla_x f)$$

which is identical to a  $l_\infty$  norm FGSM perturbation for  $\frac{\partial \ell}{\partial f} > 0$

$$\delta_{\text{FGSM}} = \epsilon \cdot \text{sgn}\left(\frac{\partial \ell}{\partial f} \nabla_x f\right).$$

## C SUPPLEMENTARY EXPERIMENT

in this part, we use MSE loss and remain other conditions unchanged in Section 4.

### C.1 SUPPLEMENTARY EXPERIMENT OF CONTRIBUTION 1

We show the supplementary experiment of Section 4.1 in Fig. 7 and Fig. 8. They have similar results to show that the spectrum of adversarial perturbations are more concentrated in the low-frequency domain after a sufficient training.

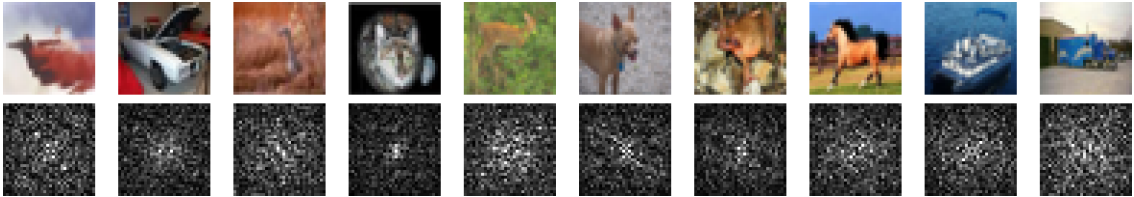

Figure 7: The difference of the spectrum between original and adversarial examples. The model are trained with MSE loss.

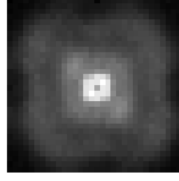

Figure 8: The expectation of the spectrum of adversarial perturbations. The model are trained with MSE loss.

## C.2 SUPPLEMENTARY EXPERIMENT OF CONTRIBUTION 2

We show the supplementary experiment of Section 4.2 in Fig. 9 and Fig. 10. They have similar results to show the log-spectrum difference of adversarial examples is generally concentrated around.

In general, there is little empirical gap between MSE loss and CrossEntropy loss.

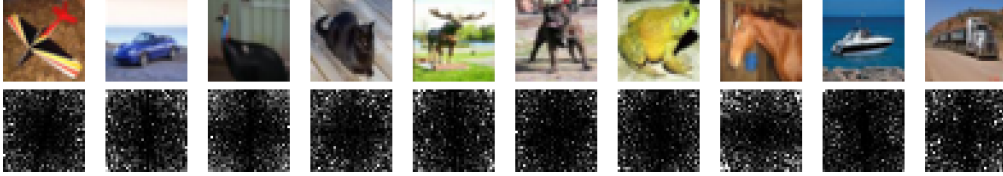

Figure 9: The difference of the log-spectrum between original and adversarial examples. The model are trained with MSE loss.

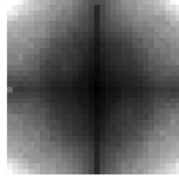

Figure 10: The expectation of the log-spectrum of adversarial perturbations. The model are trained with MSE loss.

## D PERTURBATIONS OF PGD-ATTACK ADVERSARIAL TRAINED MODEL ARE MORE CONCENTRATED IN LFC

We do use the same setup in Section 4 and the PGD-attack adversarial training is also PGD-attack with  $\epsilon = 8/255$ , 40 iterations and step size  $\xi = 4/255$  in each training step. Then we test the ratio of LFC of original images, perturbations in a normally trained model and perturbations in a PGD-attack adversarially trained model. The results are shown in Fig. 11.

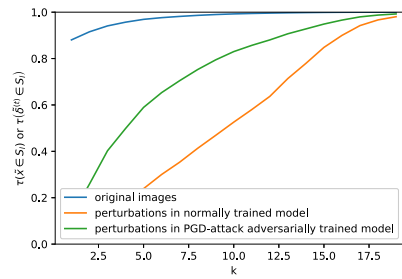

Figure 11: the ratio of LFC of original images, perturbations in a normally trained model and perturbations in a PGD-attack adversarially trained model.
